# Supplementary material for: Green synthesis of silver nanoparticles using Ocimum sanctum Linn. and its antibacterial activity against multidrug resistant Acinetobacter baumannii
Source: PeerJ. 2023 Jul 28;11:e15590. doi: 10.7717/peerj.15590 (PMC10389072; doi:10.7717/peerj.15590)
Supplement: Supplemental Information 1 — Dataset shows the Absorbance value (AB) at OD 600nm forAcinetobacter baumannii t reated with(test) and without (negative control) the presence of different concentration of AgNPs (32 ug–512 ug) and with positive control colistin (2 ug/ml) at different time interval between 0–24 h. The mean absorbance value and cell viability % is also calculated. [file peerj-11-15590-s001.xlsx]

## Sheet: Sheet1
Cell viability % of Acinetobacter baumannii at different concentrations of AgNPs and with MIC of positive control Colistin at different time interval caculated spectrophotometrically
Sl. No.	Time (Hour)	Absorbance of Negative control (Without Colistin/ AgNPs)				Absorbance of test organism [With AgNPs 32 µg/ml (MIC)]
		AB 1	AB 2	AB 3	AB Mean	AB 1	AB 2	AB 3	AB Mean	Cell viability %
1	0	0.036	0.037	0.036	0.036	0.037	0.036	0.035	0.036	100
2	1	0.041	0.044	0.046	0.043	0.034	0.035	0.032	0.033	76.74
3	2	0.05	0.054	0.049	0.051	0.033	0.033	0.031	0.032	62.74
4	4	0.075	0.076	0.069	0.073	0.038	0.036	0.041	0.038	52.05
5	8	0.164	0.161	0.16	0.162	0.06	0.063	0.058	0.06	37.03
6	12	0.21	0.216	0.217	0.214	0.106	0.104	0.107	0.105	49.06
7	18	0.317	0.313	0.316	0.315	0.192	0.189	0.193	0.191	63.63
8	24	0.349	0.346	0.35	0.348	0.218	0.22	0.221	0.221	63.5
Sl No.	Time (Hour)	Absorbance of Negative control (Without Colistin/ AgNPs)				Absorbance of test organism [With AgNPs 64 µg/ml (MBC)]				Cell viability %
		AB 1	AB 2	AB 3	AB Mean	AB 1	AB 2	AB 3	AB Mean
1	0	0.039	0.043	0.044	0.042	0.044	0.043	0.045	0.043	104.247
2	1	0.051	0.051	0.045	0.049	0.037	0.04	0.037	0.038	77.55
3	2	0.056	0.059	0.056	0.057	0.036	0.038	0.034	0.036	63.15
4	4	0.078	0.082	0.077	0.079	0.033	0.035	0.033	0.034	43.03
5	8	0.166	0.171	0.167	0.168	0.03	0.029	0.031	0.03	17.85
6	12	0.216	0.222	0.223	0.22	0.029	0.029	0.027	0.028	12.72
7	18	0.322	0.324	0.319	0.321	0.021	0.023	0.023	0.022	6.85
8	24	0.358	0.353	0.352	0.354	0.018	0.02	0.02	0.019	5.36
Sl No.	Time (Hour)	Absorbance of Negative control (Without Colistin/ AgNPs)				Absorbance of test organism [With AgNPs 128 µg/ml]				Cell viability %
		AB 1	AB 2	AB 3	AB Mean	AB 1	AB 2	AB 3	AB Mean
1	0	0.049	0.049	0.053	0.05	0.49	0.051	0.047	0.048	98.8167
2	1	0.058	0.058	0.056	0.057	0.035	0.036	0.038	0.036	63.15
3	2	0.063	0.065	0.068	0.065	0.032	0.031	0.034	0.032	49.23
4	4	0.085	0.088	0.089	0.087	0.029	0.028	0.031	0.029	33.33
5	8	0.175	0.173	0.181	0.176	0.028	0.026	0.028	0.027	15.34
6	12	0.234	0.227	0.223	0.228	0.026	0.025	0.026	0.025	10.96
7	18	0.322	0.324	0.332	0.329	0.022	0.019	0.021	0.02	6.07
8	24	0.36	0.361	0.366	0.362	0.019	0.017	0.018	0.018	4.97
Sl No.	Time (Hour)	Absorbance of Negative control (Without Colistin/ AgNPs)				Absorbance of test organism [With AgNPs 256 µg/ml]				Cell viability %
		AB 1	AB 2	AB 3	AB Mean	AB 1	AB 2	AB 3	AB Mean
1	0	0.067	0.069	0.069	0.068	0.068	0.066	0.068	0.067	99.0467
2	1	0.073	0.076	0.075	0.075	0.062	0.059	0.06	0.06	80
3	2	0.079	0.085	0.086	0.083	0.055	0.056	0.058	0.056	67.46
4	4	0.103	0.108	0.104	0.105	0.05	0.053	0.049	0.05	47.61
5	8	0.196	0.197	0.19	0.194	0.044	0.047	0.047	0.046	23.71
6	12	0.24	0.249	0.251	0.246	0.043	0.042	0.045	0.043	17.47
7	18	0.346	0.344	0.352	0.347	0.036	0.04	0.042	0.039	11.23
8	24	0.385	0.379	0.377	0.38	0.033	0.035	0.036	0.035	9.21
Sl No.	Time (Hour)	Absorbance of Negative control (Without Colistin/ AgNPs)				Absorbance of test organism [With AgNPs 512 µg/ml]				Cell viability %
		AB 1	AB 2	AB 3	AB Mean	AB 1	AB 2	AB 3	AB Mean
1	0	0.114	0.116	0.107	0.112	0.115	0.109	0.115	0.113	100.19
2	1	0.122	0.119	0.117	0.119	0.108	0.11	0.109	0.109	91.59
3	2	0.13	0.126	0.125	0.127	0.102	0.105	0.106	0.104	81.88
4	4	0.146	0.149	0.153	0.149	0.094	0.093	0.099	0.095	63.75
5	8	0.239	0.235	0.242	0.238	0.093	0.09	0.094	0.092	38.65
6	12	0.295	0.287	0.289	0.29	0.092	0.089	0.09	0.09	31.03
7	18	0.368	0.377	0.38	0.375	0.082	0.086	0.083	0.083	22.1
8	24	0.387	0.393	0.394	0.391	0.076	0.08	0.079	0.078	19.9
Sl No.	Time (Hour)	Absorbance of Negative control (Without Colistin/ AgNPs)				Absorbance of Positive control [With Colistin 2 µg/ml (MIC)]				Cell viability %
		AB 1	AB 2	AB 3	AB Mean	AB 1	AB 2	AB 3	AB Mean
1	0	0.037	0.035	0.036	0.036	0.037	0.036	0.037	0.037	100.95
2	1	0.041	0.045	0.046	0.044	0.035	0.033	0.032	0.033	75
3	2	0.05	0.055	0.049	0.051	0.033	0.031	0.031	0.031	60.78
4	4	0.074	0.077	0.07	0.073	0.034	0.035	0.035	0.034	46.57
5	8	0.163	0.162	0.162	0.162	0.055	0.054	0.052	0.053	32.71
6	12	0.212	0.217	0.213	0.214	0.11	0.107	0.111	0.109	50.93
7	18	0.318	0.323	0.321	0.32	0.171	0.174	0.173	0.172	53.75
8	24	0.369	0.366	0.365	0.366	0.211	0.209	0.212	0.21	57.37
