# Supplementary material for: Green synthesis of silver nanoparticles using Ocimum sanctum Linn. and its antibacterial activity against multidrug resistant Acinetobacter baumannii
Source: PeerJ. 2023 Jul 28;11:e15590. doi: 10.7717/peerj.15590 (PMC10389072; doi:10.7717/peerj.15590)
Supplement: Supplemental Information 3 [file peerj-11-15590-s003.xlsx]

## Sheet: Sheet1
Cell viability % of Acinetobacter baumannii at different concentrations of AgNPs and with MIC of positive control Colistin at different time interval (Dataset for Table 1)
		0 hour						4 hour						12 hour						24 hour
Sl No.	AgNPs / Colistin Concentration	AB 1	AB 2	AB 3	AB Mean	SD	Cell Viability %	AB 1	AB 2	AB 3	AB Mean	SD	Cell Viability %	AB 1	AB 2	AB 3	AB Mean	SD	Cell Viability %	AB 1	AB 2	AB 3	AB Mean	SD	Cell Viability %
1	AgNPs32 µg/mL	0.037	0.036	0.035	0.036	0	100	0.038	0.036	0.041	0.038	6.2	52.05	0.106	0.104	0.107	0.105	1.16	49.06	0.218	0.22	0.221	0.221	0.56	63.5
2	AgNPs64 µg/Ml	0.044	0.043	0.045	0.043	7.7	104.247	0.033	0.035	0.033	0.034	0.28	43.03	0.029	0.029	0.027	0.028	0.68	12.72	0.018	0.02	0.02	0.019	0.37	5.36
3	AgNPs128 µg/mL	0.49	0.051	0.047	0.048	4	98.8167	0.029	0.028	0.031	0.029	1.57	33.33	0.026	0.025	0.026	0.025	0.34	10.96	0.019	0.017	0.018	0.018	0.28	4.97
4	AgNPs256 µg/mL	0.068	0.066	0.068	0.067	3	99.0467	0.05	0.053	0.049	0.05	1.01	47.61	0.043	0.042	0.045	0.043	0.6	17.47	0.033	0.035	0.036	0.035	0.49	9.21
5	AgNPs512 µg/mL	0.115	0.109	0.115	0.113	7.1	100.19	0.094	0.093	0.099	0.095	1.24	63.75	0.092	0.089	0.09	0.09	0.75	31.03	0.076	0.08	0.079	0.078	0.36	19.9
6	Colistin 2 µg/mL	0.037	0.036	0.037	0.037	1.6	100.95	0.034	0.035	0.035	0.034	2.49	46.57	0.11	0.107	0.111	0.109	1.56	50.93	0.211	0.209	0.212	0.21	0.54	57.37
