# Supplementary material for: Green synthesis of silver nanoparticles using Ocimum sanctum Linn. and its antibacterial activity against multidrug resistant Acinetobacter baumannii
Source: PeerJ. 2023 Jul 28;11:e15590. doi: 10.7717/peerj.15590 (PMC10389072; doi:10.7717/peerj.15590)
Supplement: Supplemental Information 4 [file peerj-11-15590-s004.xlsx]

## Sheet: Sheet1
UV-Vis Spectroscopic Analysis of AgNPs of O. sanctum (Raw data for Figure 4)
Sl No.	Time	Wavelength	Absorbance 1	Absorbance 2	Absorbance 3	Absorbance Mean
1	10min	432	2.367	2.368	2.364	2.364
2	30min	438	2.411	2.413	2.398	2.407
3	50min	439	2.422	2.426	2.427	2.425
4	70min	440	2.436	2.431	2.438	2.435
5	90min	452	2.549	2.541	2.542	2.544
